# Supplementary material
Source: ML conference proceedings conference paper supplement (https://openreview.net/forum?id=0CbmvZPBGB)
Supplement: supplementary_material [file attachment]

## A Solution of $\mathbf{F}$ subproblem

$\mathbf{F}$  subproblem is written as

$$\begin{aligned} \min_{\mathbf{F}} \quad & \|\mathbf{F} - \mathbf{P}\|_F^2 + \alpha \|\mathbf{A} \odot \mathbf{F}\mathbf{F}^\top\|_1 \\ \text{s.t.} \quad & \mathbf{F}\mathbf{1}_q = \mathbf{1}_m, \mathbf{0}_{m \times q} \leq \mathbf{F} \leq \mathbf{Y}, \end{aligned} \quad (1)$$

where  $\mathbf{P} = \mathbf{K}\mathbf{H} + \mathbf{1}_m \mathbf{b}^\top \in \mathbb{R}^{m \times q}$  is the output matrix of the model. We first reformulate Eq. (1) column-wisely:

$$\begin{aligned} \min_{\mathbf{F}} \quad & \alpha \sum_{i=1}^q \mathbf{F}_{\cdot,i}^\top \mathbf{A} \mathbf{F}_{\cdot,i} + \sum_{i=1}^q \mathbf{F}_{\cdot,i}^\top \mathbf{F}_{\cdot,i} - 2 \sum_{i=1}^q \mathbf{P}_{\cdot,i}^\top \mathbf{F}_{\cdot,i} \\ \text{s.t.} \quad & \mathbf{F}\mathbf{1}_q = \mathbf{1}_m, \mathbf{0}_{m \times q} \leq \mathbf{F} \leq \mathbf{Y}, \end{aligned} \quad (2)$$

where  $\mathbf{F}_{\cdot,i}$  and  $\mathbf{P}_{\cdot,i}$  are the  $i$ -th column of  $\mathbf{F}$  and  $\mathbf{P}$  respectively. Denote  $\mathbf{f} = \text{vec}(\mathbf{F}) \in \mathbb{R}^{mq}$ ,  $\mathbf{p} = \text{vec}(\mathbf{P}) \in \mathbb{R}^{mq}$ ,  $\mathbf{y} = \text{vec}(\mathbf{Y}) \in \mathbb{R}^{mq}$ , where  $\text{vec}(\cdot)$  is the vectorization operator. Eq. (2) can be further formulated as

$$\begin{aligned} \min_{\mathbf{f}} \quad & \frac{1}{2} \mathbf{f}^\top \left( 2\mathbf{\Lambda} + \frac{2}{\alpha} \mathbf{I}_{mq \times mq} \right) \mathbf{f} - \frac{2}{\alpha} \mathbf{p}^\top \mathbf{f} \\ \text{s.t.} \quad & \sum_{\substack{j=1, \\ j \% m = i}}^{mq} \mathbf{f}_j = 1 (\forall 0 \leq i \leq m-1), \mathbf{0}_{mq} \leq \mathbf{f} \leq \mathbf{y}, \end{aligned} \quad (3)$$

where  $\%$  denotes the modulo operator,  $\mathbf{f}_j$  is the  $j$ -th element of vector  $\mathbf{f}$  and  $\mathbf{\Lambda} \in \mathbb{R}^{mq \times mq}$  is defined as

$$\mathbf{\Lambda} = \begin{bmatrix} \mathbf{A} & \mathbf{0}_{m \times m} & \cdots & \mathbf{0}_{m \times m} \\ \mathbf{0}_{m \times m} & \mathbf{A} & \ddots & \vdots \\ \vdots & \ddots & \ddots & \mathbf{0}_{m \times m} \\ \mathbf{0}_{m \times m} & \cdots & \mathbf{0}_{m \times m} & \mathbf{A} \end{bmatrix}. \quad (4)$$

Eq. (3) is a standard quadratic programming (QP) problem, which can be solved by any QP tools.

### Improve the Scalability

Eq. (3) solves a QP problem with the computational complexity of  $\mathcal{O}(m^3 q^3)$  and the storage complexity of  $\mathcal{O}(m^2 q^2)$ . To reduce the computational complexity and the storage complexity, we can approximately solve the original QP problem row-wisely, i.e., update the label confidence vector  $\tilde{\mathbf{f}}_j$  by fixing other variables:

$$\begin{aligned} \min_{\tilde{\mathbf{f}}_j} \quad & \frac{1}{2} \tilde{\mathbf{f}}_j^\top (2\mathbf{D}_{jj} + \frac{2}{\alpha}) \mathbf{I}_{q \times q} \tilde{\mathbf{f}}_j + \left( \sum_{i=1, i \neq j}^m \mathbf{D}_{ij} \tilde{\mathbf{f}}_i^\top - \frac{2}{\alpha} \mathbf{p}_j^\top \right) \tilde{\mathbf{f}}_j \\ \text{s.t.} \quad & \tilde{\mathbf{f}}_j \mathbf{1}_q = 1, \mathbf{0}_q \leq \tilde{\mathbf{f}}_j \leq \mathbf{y}_j. \end{aligned} \quad (5)$$

By this way, the original QP problem is transformed into a series of small QP problems, and the computational complexity of the QP step is reduced from  $\mathcal{O}(m^3 q^3)$  to  $\mathcal{O}(mq^3)$ , and the storage complexity is reduced from  $\mathcal{O}(m^2 q^2)$  to  $\mathcal{O}(q^2)$ .

### Computational Complexity Comparison among the Regression based PLL Methods

Table S1 compares the computational complexity between the regression based PLL methods, i.e., AGGD (TPAMI 2022), PL-CLA (JCST 2021), SDIM (IJCAI 2019), DPCLS, and DPCLS-S (Scalable DPCLS). DPCLS solves a QP problem with the computational complexity of  $\mathcal{O}(m^3 q^3)$ , which is the same as many SOTA PLL methods like AGGD, SDIM, and PL-CLA. DPCLS-S transforms the original QP problem into a series of smaller QP problems, and the computational complexity of the QP step is reduced from  $\mathcal{O}(m^3 q^3)$  to  $\mathcal{O}(mq^3)$ , and the storage complexity is reduced from  $\mathcal{O}(m^2 q^2)$  to  $\mathcal{O}(q^2)$ . This approximation solution only slightly decreases the accuracy as shown in Table S2, but largely improves the scalability.

Table S1: Computational complexity comparison between the linear regression based PLL methods.

|                          | AGGD                               | PL-CLA                      | SDIM                        | DPCLS                              | DPCLS-S                          |
|--------------------------|------------------------------------|-----------------------------|-----------------------------|------------------------------------|----------------------------------|
| Computational complexity | $\mathcal{O}(m^3 + mk^3 + m^3q^3)$ | $\mathcal{O}(m^3 + m^3q^3)$ | $\mathcal{O}(m^3 + m^3q^3)$ | $\mathcal{O}(2m^3 + m^2 + m^3q^3)$ | $\mathcal{O}(2m^3 + m^2 + mq^3)$ |

Table S2: Comparison between DPCLS and DPCLS-S, where DPCLS-S indicates scalable DPCLS.

|         | Glass            | Ecoli            | Steel            | Yeast            | Optdigits        | Usps             |
|---------|------------------|------------------|------------------|------------------|------------------|------------------|
| DPCLS   | <b>.560±.051</b> | <b>.833±.014</b> | <b>.638±.022</b> | <b>.507±.026</b> | <b>.984±.002</b> | <b>.968±.004</b> |
| DPCLS-S | .544±.049        | .821±.023        | .633±.022        | .496±.018        | .982±.001        | .966±.004        |

## B Proof of Theorem 1 and Theorem 2

### B1. Proof of Theorem 1

**Definition 1.** Denote  $\mathcal{H}$  be a family of functions that map  $\mathcal{X}$  to  $[0, 1]$  and  $S = \{x_1, x_2, \dots, x_m\}$  is a set of fixed samples. The empirical Rademacher complexity of  $\mathcal{H}$  to set  $S$  is defined as

$$\hat{\mathcal{R}}_S(\mathcal{H}) = \frac{1}{m} \mathbb{E} \left[ \sup_{h \in \mathcal{H}} \sum_{i=1}^m \sigma_i h(x_i) \right], \quad (6)$$

where  $(\sigma_1, \sigma_2, \dots, \sigma_m)$  are Rademacher variables, and each of them is an independent uniform random variable taking value in  $\{-1, +1\}$ .

The square loss function of DPCLS is  $\|\mathbf{F} - \mathbf{X}\mathbf{W}\|_F^2$ .  $\mathbf{F}$  can be divided into the sum of the ground-truth label matrix  $\mathbf{F}_G \in \mathbb{R}^{m \times q}$  and false-positive label matrix  $\mathbf{N} \in \mathbb{R}^{m \times q}$ . So we can rewrite the square loss function as  $\|\mathbf{F}_G + \mathbf{N} - \mathbf{X}\mathbf{W}\|_F^2$ . Based on **Definition 1**, let  $\mathcal{H} = \mathbf{W} \times \mathbf{N}$  be the family of functions of DPCLS, i.e.,  $(\mathbf{W}, \mathbf{N}) \in \mathcal{H}$ .  $\ell$  is the square loss function of DPCLS, the Rademacher complexity with respect to  $\mathcal{H}$  and  $\ell$  can be expressed as

$$\hat{\mathcal{R}}_S(\ell \circ \mathcal{H}) = \frac{1}{m} \mathbb{E} \left[ \sup_{h \in \mathcal{H}} \sum_{i=1}^m \sigma_i \ell(h(\mathbf{x}_i), \mathbf{F}_{G_i}) \right]. \quad (7)$$

Note that the square loss is  $2q$ -Lipschitz. According to [1], Eq. (7) is upper bounded by

$$\hat{\mathcal{R}}_S(\ell \circ \mathcal{H}) \leq \frac{2\sqrt{2}q}{m} \mathbb{E} \left[ \sup_{h \in \mathcal{H}} \sum_{i=1}^m \sum_{j=1}^q \sigma_{ij} (x_i \mathbf{W}_{.j} - \mathbf{N}_{ij}) \right], \quad (8)$$

where  $\sigma_{ij}$  is the Rademacher variable which takes value in  $\{-1, 1\}$ .  $\mathbf{W}_{.j}$  is  $j$ -th column of classifier  $\mathbf{W}$ . Denote  $\hat{\mathbf{X}} = [\hat{\mathbf{X}}_1; \hat{\mathbf{X}}_2; \dots; \hat{\mathbf{X}}_q] \in \mathbb{R}^{q \times d}$ ,  $\hat{\mathbf{X}}_q = \sum_{i=1}^n \sigma_{iq} x_i$ . Without loss of generality, we assume the complexity of classifier  $\mathbf{W}$  and the sparsity of  $\mathbf{N}$  are upper bounded by  $\epsilon_1$  and  $\epsilon_2$  respectively, i.e.,  $\|\mathbf{W}\|_F \leq \epsilon_1$  and  $\|\mathbf{N}\|_1 \leq \epsilon_2$ . The right side of Eq. (8) can be relaxed as:

$$\begin{aligned} \hat{\mathcal{R}}_S(\ell \circ \mathcal{H}) &\leq \frac{2\sqrt{2}q}{m} \mathbb{E} \left[ \sup_{h \in \mathcal{H}} \langle \mathbf{W}^T, \hat{\mathbf{X}} \rangle + \|\mathbf{N}\|_1 \right] \\ &\leq \frac{2\sqrt{2}q}{m} \mathbb{E} \left[ \sup_{h \in \mathcal{H}} \|\mathbf{W}\|_F \|\hat{\mathbf{X}}\|_F + \|\mathbf{N}\|_1 \right] \\ &\leq \frac{2\sqrt{2}q}{m} \mathbb{E} \left[ \sup_{h \in \mathcal{H}} \epsilon_1 \|\hat{\mathbf{X}}\|_F + \epsilon_2 \right]. \end{aligned} \quad (9)$$

We assume each sample is normalized, i.e.,  $\|x_i\|_2 \leq 1$ , it is easy to prove that

$$\mathbb{E}_\sigma \|\hat{\mathbf{X}}\|_F^2 = \mathbb{E}_\sigma \left[ \sum_{j=1}^q \|\hat{\mathbf{X}}_j\|_2^2 \right] = \mathbb{E}_\sigma \left[ \sum_{j=1}^q \left\| \sum_{i=1}^m \sigma_{ij} \mathbf{x}_i \right\|_2^2 \right] \leq mq. \quad (10)$$

According to Eq. (9) and Eq. (10) we have **Theorem 1**

$$\hat{\mathcal{R}}_S(\ell \circ \mathcal{H}) \leq \frac{2\sqrt{2}q(\sqrt{mq}\epsilon_1 + \epsilon_2)}{m}. \quad (11)$$

## B2. Proof of Theorem 2 Inequality 1

Denote  $\mathbf{F} \in \{0, 1\}^{m \times q}$  and  $\mathbf{D} \in \{0, 1\}^{m \times m}$  the partial label matrix and the to be optimized semantic dissimilarity matrix. Let  $\mathbf{F}_G$  and  $\hat{\mathbf{D}}$  be the ground-truth label matrix and the ground-truth dissimilarity matrix. Denote  $\Delta_{\mathbf{F}} = \mathbf{F}_G - \mathbf{F}$ . We aim to minimize the adversarial prior between the semantic dissimilarity matrix and similarity matrix, i.e.,  $\|\mathbf{D} \odot \mathbf{F}\mathbf{F}^T\|_1$ . The following inequality holds

$$\langle (\mathbf{F} + \Delta_{\mathbf{F}})(\mathbf{F} + \Delta_{\mathbf{F}})^T, \hat{\mathbf{D}} \rangle \leq \langle \mathbf{F}\mathbf{F}^T, \mathbf{D} \rangle. \quad (12)$$

Expand Eq. (12), we have

$$\begin{aligned} \langle \Delta_{\mathbf{F}}\Delta_{\mathbf{F}}^T, \hat{\mathbf{D}} \rangle &\leq \langle \mathbf{F}\mathbf{F}^T, \mathbf{D} - \hat{\mathbf{D}} \rangle - \langle \mathbf{F}\Delta_{\mathbf{F}}^T, \hat{\mathbf{D}} \rangle - \langle \Delta_{\mathbf{F}}\mathbf{F}^T, \hat{\mathbf{D}} \rangle \\ &= \langle \mathbf{F}\mathbf{F}^T, \mathbf{D} - \hat{\mathbf{D}} \rangle + \langle \mathbf{F}\Delta_{\mathbf{F}}^T, -\hat{\mathbf{D}} \rangle + \langle \Delta_{\mathbf{F}}\mathbf{F}^T, -\hat{\mathbf{D}} \rangle \\ &\leq \|\mathbf{F}\|_F^2 \|\mathbf{D} - \hat{\mathbf{D}}\|_F + 2\|\mathbf{F}\|_F \|\hat{\mathbf{D}}\|_F \|\Delta_{\mathbf{F}}\|_F. \end{aligned} \quad (13)$$

Due to the characteristics of PLL, at least one false-positive label exists in each PLL data set, i.e.,  $\|\Delta_{\mathbf{F}}\|_F \geq 1$ . In this way, we have

$$\langle \Delta_{\mathbf{F}}\Delta_{\mathbf{F}}^T, \hat{\mathbf{D}} \rangle \leq \|\mathbf{F}\|_F^2 \|\mathbf{D} - \hat{\mathbf{D}}\|_F + 2\|\mathbf{F}\|_F \|\hat{\mathbf{D}}\|_F \|\Delta_{\mathbf{F}}\|_F. \quad (14)$$

Assume the smallest eigenvalue of  $\hat{\mathbf{D}}$  is  $\lambda_{\hat{\mathbf{D}}}$  and  $\lambda_{\hat{\mathbf{D}}} \geq 0$ , we have  $\langle \Delta_{\mathbf{F}}\Delta_{\mathbf{F}}^T, \hat{\mathbf{D}} \rangle \geq \lambda_{\hat{\mathbf{D}}} \|\Delta_{\mathbf{F}}\|_F^2$ . Moreover,  $\|\mathbf{F}\|_F^2$  is upper bounded by  $m$  (the number of samples) and  $q$  (the number of classes), i.e.,  $\|\mathbf{F}\|_F^2 \leq mq$ . Eq. (14) can be further relaxed as

$$\lambda_{\hat{\mathbf{D}}} \|\Delta_{\mathbf{F}}\|_F^2 \leq mq \|\mathbf{D} - \hat{\mathbf{D}}\|_F + 2\sqrt{mq} \|\hat{\mathbf{D}}\|_F \|\Delta_{\mathbf{F}}\|_F. \quad (15)$$

Let  $\|\bar{\Delta}_{\mathbf{F}}\|_F$  be the average distance of each sample between  $\mathbf{F}_G$  and  $\mathbf{F}$  (i.e.,  $\|\bar{\Delta}_{\mathbf{F}}\|_F = \frac{1}{m} \|\mathbf{F}_G - \mathbf{F}\|_F$ ). Dividing  $m$  on both sides of Eq. (15), we finally have

$$\|\bar{\Delta}_{\mathbf{F}}\|_F \leq \frac{q}{\lambda_{\hat{\mathbf{D}}}} \|\mathbf{D} - \hat{\mathbf{D}}\|_F + \frac{2\sqrt{q}}{\lambda_{\hat{\mathbf{D}}}\sqrt{m}} \|\hat{\mathbf{D}}\|_F. \quad (16)$$

We can find that as the number of samples  $m$  increases, the upper bound of  $\|\bar{\Delta}_{\mathbf{F}}\|_F$  decreases, which indicates that more training samples will push the partial label matrix to be close to the ground-truth one and achieve better PLL performance. Moreover, a smaller error between  $\mathbf{D}$  and  $\hat{\mathbf{D}}$  implies a smaller upper bound of  $\|\bar{\Delta}_{\mathbf{F}}\|_F$ , which indicates a better dissimilarity matrix can help achieve a better label matrix.

## B3. Proof of Theorem 2 Inequality 2

Denote  $\Delta_{\mathbf{D}} = \hat{\mathbf{D}} - \mathbf{D}$ . According to the adversarial relationship and dissimilarity propagation of DPCLS, we assume each sample and its  $k$  neighborhoods belong to the same class, then the following inequality holds

$$\langle \mathbf{F}_G\mathbf{F}_G^T, \mathbf{D} + \Delta_{\mathbf{D}} \rangle + \text{Tr}((\mathbf{D} + \Delta_{\mathbf{D}})\mathbf{L}(\mathbf{D} + \Delta_{\mathbf{D}})^T) \leq \langle \mathbf{F}\mathbf{F}^T, \mathbf{D} \rangle + \text{Tr}((\mathbf{D}\mathbf{L}\mathbf{D})^T). \quad (17)$$

Expand Eq. (17), we have

$$\begin{aligned} \langle \Delta_{\mathbf{D}}^T \Delta_{\mathbf{D}}, \mathbf{L} \rangle &\leq \langle \mathbf{F}\mathbf{F}^T - \mathbf{F}_G\mathbf{F}_G^T, \mathbf{D} \rangle - 2\langle \Delta_{\mathbf{D}}, \mathbf{D}\mathbf{L} \rangle - \langle \mathbf{F}_G\mathbf{F}_G^T, \Delta_{\mathbf{D}}^T \rangle \\ &= \langle \mathbf{F}\mathbf{F}^T - \mathbf{F}_G\mathbf{F}_G^T, \mathbf{D} \rangle + 2\langle \Delta_{\mathbf{D}}, -\mathbf{D}\mathbf{L} \rangle + \langle \mathbf{F}_G\mathbf{F}_G^T, -\Delta_{\mathbf{D}}^T \rangle \\ &\leq \|\mathbf{F}\mathbf{F}^T - \mathbf{F}_G\mathbf{F}_G^T\|_F \|\mathbf{D}\|_F + 2\|\mathbf{D}\|_F \|\mathbf{L}\|_F \|\Delta_{\mathbf{D}}\|_F + \|\mathbf{F}_G\|_F^2 \|\Delta_{\mathbf{D}}\|. \end{aligned} \quad (18)$$

Assume that at least one corresponding position of  $\hat{\mathbf{D}}$  and  $\mathbf{D}$  has different values, i.e.,  $\|\Delta_{\mathbf{D}}\|_F \geq 1$ , we have

$$\langle \Delta_{\mathbf{D}}^T \Delta_{\mathbf{D}}, \mathbf{L} \rangle \leq \|\mathbf{F}\mathbf{F}^T - \mathbf{F}_G\mathbf{F}_G^T\|_F \|\mathbf{D}\|_F + 2\|\mathbf{D}\|_F \|\mathbf{L}\|_F \|\Delta_{\mathbf{D}}\|_F + \|\mathbf{F}_G\|_F^2 \|\Delta_{\mathbf{D}}\|. \quad (19)$$

Similar to **B2**, we assume the smallest eigenvalue of  $\mathbf{L}$  is  $\lambda_{\mathbf{L}}$  and  $\lambda_{\mathbf{L}} \geq 0$ , we have  $\langle \mathbf{\Delta}_{\mathbf{D}}^{\top} \mathbf{\Delta}_{\mathbf{D}}, \mathbf{L} \rangle \geq \lambda_{\mathbf{L}} \|\mathbf{\Delta}_{\mathbf{D}}\|_F^2$ .  $\|\mathbf{D}\|_F^2$  is upper bounded by  $m$  (the number of samples), i.e.,  $\|\mathbf{D}\|_F^2 \leq m^2$ . Since  $\mathbf{F}_{\mathbf{G}}$  is the ground truth label matrix, we have  $\|\mathbf{F}_{\mathbf{G}}\|_F^2 = m$ . Eq. (19) can be further relaxed as

$$\lambda_{\mathbf{L}} \|\mathbf{\Delta}_{\mathbf{D}}\|_F^2 \leq m \left\| \mathbf{F}\mathbf{F}^{\top} - \mathbf{F}_{\mathbf{G}}\mathbf{F}_{\mathbf{G}}^{\top} \right\|_F \|\mathbf{\Delta}_{\mathbf{D}}\|_F + 2m \|\mathbf{L}\|_F \|\mathbf{\Delta}_{\mathbf{D}}\|_F + m \|\mathbf{\Delta}_{\mathbf{D}}\|. \quad (20)$$

Let  $\|\bar{\mathbf{\Delta}}_{\mathbf{D}}\|_F$  be the average distance of each corresponding position between  $\hat{\mathbf{D}}$  and  $\mathbf{D}$  (i.e.,  $\|\bar{\mathbf{\Delta}}_{\mathbf{D}}\|_F = \frac{1}{m^2} \|\hat{\mathbf{D}} - \mathbf{D}\|_F$ ). Dividing  $m^2$  on both sides of Eq. (20), we finally have

$$\|\bar{\mathbf{\Delta}}_{\mathbf{D}}\|_F \leq \frac{1}{\lambda_{\mathbf{L}}m} \left\| \mathbf{F}\mathbf{F}^{\top} - \mathbf{F}_{\mathbf{G}}\mathbf{F}_{\mathbf{G}}^{\top} \right\|_F + \frac{2}{\lambda_{\mathbf{L}}m} \|\mathbf{L}\|_F + \frac{1}{\lambda_{\mathbf{L}}m}. \quad (21)$$

Similar to **B2**, a larger number of training samples will reduce the distance between  $\mathbf{D}$  and  $\hat{\mathbf{D}}$ , and a smaller error between  $\mathbf{F}$  and  $\mathbf{F}_{\mathbf{G}}$  implies a smaller upper bound of  $\|\bar{\mathbf{\Delta}}_{\mathbf{D}}\|_F$ , suggesting a better dissimilarity matrix.

## C Details of Compared Data Sets

Table S3: Characteristics of the synthetic data sets and the real-world partial label data sets, where Avg. CLs means the average size of the candidate label set.

| Type                | Data set      | # Examples | # Features | # Classes | Avg. CLs |
|---------------------|---------------|------------|------------|-----------|----------|
| Synthetic Data Set  | Glass         | 214        | 9          | 6         | -        |
|                     | Steel         | 1941       | 27         | 7         | -        |
|                     | Ecoli         | 336        | 7          | 8         | -        |
|                     | Yeast         | 1484       | 8          | 10        | -        |
|                     | Optdigits     | 5620       | 64         | 10        | -        |
|                     | Usps          | 9298       | 256        | 10        | -        |
|                     | isolet        | 1559       | 617        | 26        | -        |
|                     | Orl           | 400        | 1024       | 40        | -        |
|                     | Amazon        | 1500       | 1326       | 50        | -        |
| Bookmark            | 2500          | 1413       | 57         | -         |          |
| Real-world Data Set | FG-NET        | 1002       | 262        | 78        | 7.48     |
|                     | Lost          | 1122       | 108        | 16        | 2.23     |
|                     | MSRCv2        | 1758       | 48         | 23        | 3.16     |
|                     | BirdSong      | 4998       | 38         | 13        | 2.18     |
|                     | Malagasy      | 5303       | 384        | 44        | 8.35     |
|                     | Soccer Player | 17472      | 279        | 171       | 2.09     |
|                     | Yahoo! News   | 22991      | 163        | 219       | 1.91     |

We evaluated ten synthetic data sets and seven real-world partial label data sets from various domains, whose details are shown in Table S3. The real-world data sets are publicly available at <http://palm.seu.edu.cn/zhangml/> and <https://github.com/dhgarrette/low-resource-pos-tagging-2013>.

## D Further Analysis

### Hyper-parameters Sensitivity

Our DPCLS has four parameters, i.e.,  $\alpha$ ,  $\beta$ ,  $\lambda$  and  $k$ . Fig. S1 investigates their influence to DPCLS on Lost and MSRCv2. As shown in Figs. S1 (a) - (b), when  $\alpha$  and  $\beta$  are too large or too small, DPCLS gives relatively poor performance. DPCLS reaches best performance when  $\alpha$  is selected from  $\{0.001, 0.01\}$  and  $\beta$  is set to 0.001. Parameter  $\lambda$  controls the model complexity. We can observe from Fig. S1 (c) that the proposed model performs relatively stable when  $\lambda$  changes, and setting  $\lambda=0.05$  is a good choice on both Lost and MSRCv2. Fig. S1 (d) indicates that the performance of DPCLS is relatively robust to different  $k$ .

Table S4: Comparison between DPCLS and DPCLS-T, where DPCLS-T indicates a two-stage model.

|         | FG-NET           | Lost             | MSRCv2           | BirdSong         | Malagasy         | Soccer player    | Yahoo! News      |
|---------|------------------|------------------|------------------|------------------|------------------|------------------|------------------|
| DPCLS   | <b>.077±.009</b> | <b>.770±.024</b> | <b>.557±.014</b> | <b>.751±.009</b> | <b>.676±.004</b> | <b>.532±.002</b> | <b>.626±.003</b> |
| DPCLS-T | .073±.018        | .712±.018●       | .483±.014●       | .723±.014●       | .671±.005        | .530±.003        | .567±.003●       |

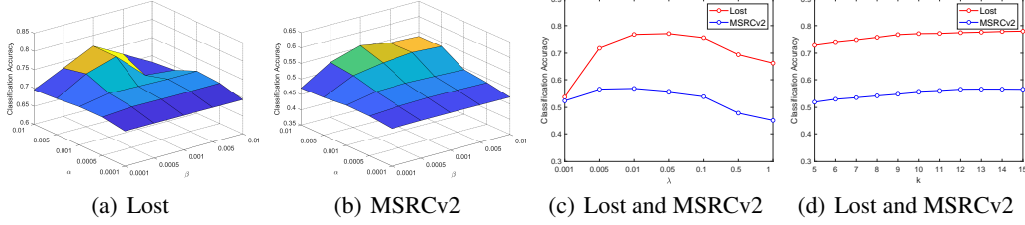

Figure S1: Parameter sensitivity analysis for DPCLS. (a-b) Classification accuracies of DPCLS on Lost and MSRCv2 by varying  $\alpha$  and  $\beta$ ; (c) Classification accuracies of DPCLS on Lost and MSRCv2 by varying  $\lambda$ ; (d) Classification accuracies of DPCLS on Lost and MSRCv2 by varying  $k$ .

### DPCLS VS. Two-stage Model

In Table S4 we compared DPCLS with a two-stage model (denoted as DPCLS-T) that performs dissimilarity matrix construction and classifier learning separately. We find that the two-stage model is significantly inferior to DPCLS, proving the advantage of end-to-end learning.

### References

- [1] Andreas Maurer. A vector-contraction inequality for rademacher complexities. In Ronald Ortner, Hans Ulrich Simon, and Sandra Zilles, editors, *Algorithmic Learning Theory - 27th International Conference, ALT*, volume 9925, pages 3–17, 2016.
